# Supplementary material for: Plasma Phospholipid n-3/n-6 Polyunsaturated Fatty Acids and Desaturase Activities in Relation to Moderate-to-Vigorous Physical Activity through Pregnancy: A Longitudinal Study within the NICHD Fetal Growth Studies
Source: PubMed Central journal article supplement (PMC7699189; doi:10.3390/nu12113544), 2020-11-19
Supplement: nutrients-12-03544-s001.pdf [file nutrients-12-03544-s001.pdf]

## Supplement tables and figures

**Supplement Table 1.** Maternal plasma phospholipid polyunsaturated fatty acids (PUFAs) composition at each study visits, the NICHD Fetal Growth Studies–Singleton Cohort

|                                                  | Visit 0<br>(8–13 weeks) | Visit 1<br>(16–22 weeks) | Visit 2<br>(24–29 weeks) | Visit 4<br>(34–37 weeks) |
|--------------------------------------------------|-------------------------|--------------------------|--------------------------|--------------------------|
| <b>Sum of n-3 PUFAs</b> (% of total fatty acids) | 5.39 (0.08)             | 5.10 (0.08)*             | 5.11 (0.10)*             | 4.88 (0.09)*             |
| 18:3n-3 (ALA)                                    | 0.21 (0.004)            | 0.25 (0.0004)*           | 0.27 (0.01)*             | 0.26 (0.01)*             |
| 20:5n-3 (EPA)                                    | 0.34 (0.01)             | 0.19 (0.01)*             | 0.31 (0.01)              | 0.28 (0.01)*             |
| 22:5n-3 (DPA)                                    | 0.69 (0.01)             | 0.63 (0.01)*             | 0.61 (0.01)*             | 0.54 (0.01)*             |
| 22:6n-3 (DHA)                                    | 4.16 (0.07)             | 4.03 (0.08)*             | 3.92 (0.09)*             | 3.80 (0.08)*             |
| <b>Sum of n-6 PUFAs</b> (% of total fatty acids) | 37.08 (0.14)            | 36.93 (0.13)             | 37.03 (0.16)             | 36.88 (0.17)*            |
| 18:2n-6 (LA)                                     | 20.67 (0.15)            | 21.69 (0.15)*            | 21.93 (0.19)*            | 22.38 (0.18)*            |
| 18:3n-6 (GLA)                                    | 0.08 (0.002)            | 0.08 (0.002)             | 0.07 (0.002)             | 0.07 (0.002)             |
| 20:2n-6 (EDA)                                    | 0.50 (0.01)             | 0.51 (0.01)              | 0.51 (0.01)              | 0.46 (0.01)*             |
| 20:3n-6 (DGLA)                                   | 3.38 (0.05)             | 3.40 (0.04)              | 3.40 (0.05)              | 3.30 (0.06)*             |
| 20:4n-6 (AA)                                     | 11.36 (0.11)            | 0.42 (0.12)*             | 9.98 (0.14)*             | 9.55 (0.13)*             |
| 22:4n-6 (DTA)                                    | 0.52 (0.01)             | 0.30 (0.01)*             | 0.53 (0.01)              | 0.48 (0.01)*             |
| 22:5n-6 (n6-DPA)                                 | 0.56 (0.01)             | 0.53 (0.01)              | 0.61 (0.02)*             | 0.63 (0.02)*             |
| <b>PUFA ratios</b>                               |                         |                          |                          |                          |
| GLA/LA ( $\Delta 6$ -desaturase)                 | 0.004 (0.0001)          | 0.004 (0.0001)*          | 0.003 (0.0001)           | 0.003 (0.0001)*          |
| AA/DGLA ( $\Delta 5$ -desaturase)                | 3.61 (0.07)             | 3.27 (0.07)*             | 3.11 (0.07)*             | 3.12 (0.08)*             |

- Data are presented as weighted mean (standard errors, SE).
- Sampling weights were applied to all analyses to represent the full NICHD Fetal Growth Studies–Singletons Cohort.
- \*P-values < 0.05 when comparing each visit to visit 0 using paired *t*-tests.
- Abbreviations: PUFA, polyunsaturated fatty acids; AA, arachidonic acid; ALA, alpha-linolenic acid; DGLA, dihomo-gamma-linolenic acid; DHA, docosahexaenoic acid; DPA, docosapentaenoic acid; DTA, docosatetraenoic acid; EDA, eicosadienoic acid; EPA, eicosapentaenoic acid; GDM, gestational diabetes mellitus; GLA, gamma-linolenic acid; LA, linoleic acid; PUFA, polyunsaturated fatty acid

**Supplement Table 2.** Associations of maternal moderate-to-vigorous physical activity (MVPA) and plasma phospholipid polyunsaturated fatty acids (PUFAs) at visit 2 and visit 4 among women without GDM, the NICHD Fetal Growth Studies–Singleton Cohort

|                                                    | Visit 2 (24-29 weeks)<br>(N=107) |               | Visit 4 (34-37 weeks)<br>(N=102) |          |
|----------------------------------------------------|----------------------------------|---------------|----------------------------------|----------|
|                                                    | $\beta$ (SE)                     | <i>P</i>      | $\beta$ (SE)                     | <i>P</i> |
| <b>MVPA as continuous variable (hour per week)</b> |                                  |               |                                  |          |
| <b>Sum of n-3 PUFAs (% of total fatty acids)</b>   | 0.043 (0.053)                    | 0.98          | 0.034 (0.067)                    | 0.80     |
| 18:3n-3 (ALA)                                      | -0.006 (0.004)                   | 0.13          | -0.002 (0.005)                   | 0.55     |
| 20:5n-3 (EPA)                                      | 0.005 (0.008)                    | 0.80          | 0.003 (0.008)                    | 0.48     |
| 22:5n-3 (DPA)                                      | 0.013 (0.008)                    | 0.51          | 0.010 (0.009)                    | 0.72     |
| 22:6n-3 (DHA)                                      | 0.030 (0.048)                    | 0.99          | 0.023 (0.062)                    | 0.71     |
| <b>Sum of n-6 PUFAs (% of total fatty acids)</b>   | <b>-0.159 (0.099)</b>            | <b>0.003*</b> | 0.027 (0.126)                    | 0.61     |
| 18:2n-6 (LA)                                       | -0.291 (0.119)                   | 0.02          | -0.154 (0.148)                   | 0.52     |
| 18:3n-6 (GLA)                                      | 0.002 (0.001)                    | 0.67          | -0.002 (0.002)                   | 0.11     |
| 20:2n-6 (EDA)                                      | -0.002 (0.004)                   | 0.22          | -0.006 (0.005)                   | 0.64     |
| 20:3n-6 (DGLA)                                     | -0.012 (0.029)                   | 0.21          | 0.009 (0.039)                    | 0.46     |
| 20:4n-6 (AA)                                       | 0.115 (0.079)                    | 0.87          | 0.163 (0.094)                    | 0.55     |
| 22:4n-6 (DTA)                                      | -0.001 (0.008)                   | 0.60          | 0.002 (0.010)                    | 0.74     |
| 22:5n-6 (n6-DPA)                                   | 0.030 (0.011)                    | 0.12          | 0.016 (0.015)                    | 0.53     |
| <b>PUFA ratio</b>                                  |                                  |               |                                  |          |
| GLA/LA ( $\Delta 6$ -desaturase)                   | 0.0001 (0.00007)                 | 0.38          | -0.00008 (0.00009)               | 0.90     |
| AA/DGLA ( $\Delta 5$ -desaturase)                  | 0.033 (0.040)                    | 0.46          | 0.036 (0.052)                    | 0.50     |
| <b>MVPA high vs. low (reference group)</b>         |                                  |               |                                  |          |
| <b>Sum of n-3 PUFAs (% of total fatty acids)</b>   | 0.42 (0.25)                      | 0.09          | 0.07 (0.27)                      | 0.79     |
| 18:3n-3 (ALA)                                      | -0.01 (0.02)                     | 0.72          | -0.001 (0.02)                    | 0.95     |
| 20:5n-3 (EPA)                                      | 0.08 (0.04)                      | 0.02          | 0.03 (0.03)                      | 0.30     |
| 22:5n-3 (DPA)                                      | 0.05 (0.04)                      | 0.16          | 0.004 (0.04)                     | 0.91     |
| 22:6n-3 (DHA)                                      | 0.30 (0.23)                      | 0.19          | 0.04 (0.25)                      | 0.89     |
| <b>Sum of n-6 PUFAs (% of total fatty acids)</b>   | -0.89 (0.46)                     | 0.06          | -0.03 (0.51)                     | 0.95     |
| 18:2n-6 (LA)                                       | -1.28 (0.56)                     | 0.02          | -0.42 (0.60)                     | 0.48     |
| 18:3n-6 (GLA)                                      | 0.01 (0.01)                      | 0.31          | -0.002 (0.01)                    | 0.80     |

|                                  |                 |      |                 |      |
|----------------------------------|-----------------|------|-----------------|------|
| 20:2n-6 (EDA)                    | -0.01 (0.02)    | 0.43 | -0.03 (0.02)    | 0.15 |
| 20:3n-6 (DGLA)                   | -0.06 (0.14)    | 0.67 | -0.01 (0.16)    | 0.93 |
| 20:4n-6 (AA)                     | 0.35 (0.38)     | 0.35 | 0.37 (0.38)     | 0.34 |
| 22:4n-6 (DTA)                    | 0.02 (0.04)     | 0.55 | 0.01 (0.04)     | 0.72 |
| 22:5n-6 (n6-DPA)                 | 0.09 (0.05)     | 0.09 | 0.05 (0.06)     | 0.38 |
| <b>PUFA ratios</b>               |                 |      |                 |      |
| GLA/LA ( $\Delta$ 6-desaturase)  | 0.0005 (0.0003) | 0.12 | 0.0004 (0.0004) | 0.91 |
| AA/DGLA ( $\Delta$ 5-desaturase) | 0.15 (0.19)     | 0.42 | 0.15 (0.21)     | 0.48 |

- Multivariable linear regression models adjusted for age (years), race, education, marital status, nulliparous, and pre-pregnancy body mass index (BMI; kg/m<sup>2</sup>), Alternative Health Eating Index (AHEI) score.
- Individual PUFA is measured as % of total fatty acids.
- Women were classified into high MVPA group if they had  $\geq$  150 minutes of moderate-to-vigorous physical activity (MVPA) per week.
- \*P-value is significant after Bonferroni correction.
- Abbreviations: PUFA, polyunsaturated fatty acids; AA, arachidonic acid; ALA, alpha-linolenic acid; DGLA, dihomo-gamma-linolenic acid; DHA, docosahexaenoic acid; DPA, docosapentaenoic acid; DTA, docosatetraenoic acid; EDA, eicosadienoic acid; EPA, eicosapentaenoic acid; GDM, gestational diabetes mellitus; GLA, gamma-linolenic acid; LA, linoleic acid; PUFA, polyunsaturated fatty acid

**Supplement Table 3.** Associations of change in maternal moderate-to-vigorous physical activity (MVPA) levels between visit 0 and visit 4 and plasma phospholipid polyunsaturated fatty acids (PUFAs) at visit 4 among women without GDM, the NICHD Fetal Growth Studies–Singleton Cohort

|                                                  | Reference | Low-Low (N=42)  |          | High-High (N=16) |          | High-Low (N=37) |          | Low-High (N=7) |          |
|--------------------------------------------------|-----------|-----------------|----------|------------------|----------|-----------------|----------|----------------|----------|
|                                                  |           | $\beta$ (SE)    | <i>P</i> | $\beta$ (SE)     | <i>P</i> | $\beta$ (SE)    | <i>P</i> | $\beta$ (SE)   | <i>P</i> |
| <b>Sum of n-3 PUFAs</b> (% of total fatty acids) | Reference | 0.21 (0.39)     | 0.59     | 0.20 (0.25)      | 0.43     | -0.16 (0.48)    | 0.74     |                |          |
| 18:3n-3 (ALA)                                    | Reference | 0.02 (0.03)     | 0.55     | -0.003 (0.02)    | 0.87     | -0.05 (0.03)    | 0.10     |                |          |
| 20:5n-3 (EPA)                                    | Reference | 0.02 (0.04)     | 0.61     | -0.05 (0.02)     | 0.04     | -0.04 (0.04)    | 0.28     |                |          |
| 22:5n-3 (DPA)                                    | Reference | 0.10 (0.05)     | 0.03     | 0.02 (0.03)      | 0.47     | -0.06 (0.06)    | 0.26     |                |          |
| 22:6n-3 (DHA)                                    | Reference | 0.07 (0.35)     | 0.84     | 0.23 (0.23)      | 0.32     | -0.004 (0.43)   | 0.99     |                |          |
| <b>Sum of n-6 PUFAs</b> (% of total fatty acids) | Reference | -0.83 (0.65)    | 0.20     | -0.66 (0.45)     | 0.14     | 1.31 (0.71)     | 0.06     |                |          |
| 18:2n-6 (LA)                                     | Reference | -1.57 (0.72)    | 0.03     | -0.94 (0.54)     | 0.08     | 0.90 (0.87)     | 0.30     |                |          |
| 18:3n-6 (GLA)                                    | Reference | 0.003 (0.01)    | 0.78     | -0.01 (0.01)     | 0.28     | -0.02 (0.01)    | 0.04     |                |          |
| 20:2n-6 (EDA)                                    | Reference | -0.004 (0.03)   | 0.88     | 0.02 (0.02)      | 0.38     | -0.07 (0.04)    | 0.06     |                |          |
| 20:3n-6 (DGLA)                                   | Reference | 0.27 (0.23)     | 0.24     | 0.08 (0.14)      | 0.57     | -0.48 (0.29)    | 0.09     |                |          |
| 20:4n-6 (AA)                                     | Reference | 0.38 (0.53)     | 0.47     | 0.25 (0.33)      | 0.45     | 1.09 (0.58)     | 0.06     |                |          |
| 22:4n-6 (DTA)                                    | Reference | -0.04 (0.05)    | 0.45     | -0.08 (0.03)     | 0.01     | -0.02 (0.07)    | 0.81     |                |          |
| 22:5n-6 (n6-DPA)                                 | Reference | 0.13 (0.09)     | 0.17     | 0.03 (0.05)      | 0.59     | -0.10 (0.10)    | 0.33     |                |          |
| <b>PUFA ratios</b>                               |           |                 |          |                  |          |                 |          |                |          |
| GLA/LA ( $\Delta 6$ -desaturase)                 | Reference | 0.0004 (0.0005) | 0.45     | -0.0002 (0.0003) | 0.59     | -0.001 (0.0005) | 0.03     |                |          |
| AA/DGLA ( $\Delta 5$ -desaturase)                | Reference | -0.16 (0.31)    | 0.60     | -0.12 (0.19)     | 0.55     | 0.85 (0.38)     | 0.03     |                |          |

- Multivariable linear regression models adjusted for age (years), race, education, marital status, nulliparous, and pre-pregnancy body mass index (BMI; kg/m<sup>2</sup>), and Alternative Health Eating Index (AHEI) score.
- Individual PUFA is measured as % of total fatty acids.
- \*P-value is significant after Bonferroni correction.
- Abbreviations: **PUFA**, polyunsaturated fatty acids; AA, arachidonic acid; ALA, alpha-linolenic acid; DGLA, dihomo-gamma-linolenic acid; DHA, docosahexaenoic acid; DPA, docosapentaenoic acid; DTA, docosatetraenoic acid; EDA, eicosadienoic acid; EPA, eicosapentaenoic acid; GDM, gestational diabetes mellitus; GLA, gamma-linolenic acid; LA, linoleic acid; PUFA, polyunsaturated fatty acid.

**Supplement Table 4.** Time-specific associations of maternal moderate-to-vigorous physical activity (MVPA) and plasma phospholipid polyunsaturated fatty acids (PUFAs) at each study visits, the NICHD Fetal Growth Studies–Singleton Cohort

|                                                    | Visit 0 <sup>§</sup><br>(8-13 weeks)<br>(N=318) |          | Visit 1 <sup>†</sup><br>(16-22 weeks)<br>(N=308) |          | Visit 2 <sup>‡</sup><br>(24-29 weeks)<br>(N=207) |                   | Visit 4 <sup>‡</sup><br>(34-37 weeks)<br>(N=190) |                   |
|----------------------------------------------------|-------------------------------------------------|----------|--------------------------------------------------|----------|--------------------------------------------------|-------------------|--------------------------------------------------|-------------------|
|                                                    | $\beta$ (SE)                                    | <i>P</i> | $\beta$ (SE)                                     | <i>P</i> | $\beta$ (SE)                                     | <i>P</i>          | $\beta$ (SE)                                     | <i>P</i>          |
| <b>MVPA as continuous variable (hour per week)</b> |                                                 |          |                                                  |          |                                                  |                   |                                                  |                   |
| Sum of n-3 PUFAs (% of total fatty acids)          | 0.008 (0.027)                                   | 0.78     | -0.050 (0.038)                                   | 0.19     | 0.004 (0.038)                                    | 0.92              | 0.001 (0.042)                                    | 0.99              |
| 18:3n-3 (ALA)                                      | -0.0001 (0.001)                                 | 0.95     | 0.001 (0.002)                                    | 0.51     | -0.005 (0.003)                                   | 0.05              | 0.001 (0.003)                                    | 0.86              |
| 20:5n-3 (EPA)                                      | 0.006 (0.004)                                   | 0.11     | 0.002 (0.003)                                    | 0.42     | 0.001 (0.005)                                    | 0.80              | -0.003 (0.005)                                   | 0.55              |
| 22:5n-3 (DPA)                                      | 0.002 (0.005)                                   | 0.68     | -0.011 (0.006)                                   | 0.04     | 0.006 (0.006)                                    | 0.30              | 0.013 (0.005)                                    | 0.02              |
| 22:6n-3 (DHA)                                      | 0.00001 (0.026)                                 | 1.00     | -0.042 (0.035)                                   | 0.22     | 0.002 (0.034)                                    | 0.95              | -0.010 (0.038)                                   | 0.80              |
| Sum of n-6 PUFAs (% of total fatty acids)          | -0.145 (0.058)                                  | 0.01     | 0.009 (0.061)                                    | 0.88     | <b>-0.278 (0.068)</b>                            | <b>&lt;0.001*</b> | -0.092 (0.080)                                   | 0.25              |
| 18:2n-6 (LA)                                       | -0.107 (0.061)                                  | 0.08     | -0.071 (0.074)                                   | 0.34     | <b>-0.280 (0.081)</b>                            | <b>0.001*</b>     | -0.180 (0.094)                                   | 0.05              |
| 18:3n-6 (GLA)                                      | -0.0001 (0.001)                                 | 0.92     | 0.002 (0.001)                                    | 0.04     | 0.001 (0.001)                                    | 0.56              | <b>-0.004 (0.001)</b>                            | <b>&lt;0.001*</b> |
| 20:2n-6 (EDA)                                      | 0.0002 (0.002)                                  | 0.90     | -0.0002 (0.003)                                  | 0.95     | -0.004 (0.002)                                   | 0.15              | -0.001 (0.003)                                   | 0.80              |
| 20:3n-6 (DGLA)                                     | 0.010 (0.019)                                   | 0.59     | 0.014 (0.021)                                    | 0.52     | -0.030 (0.020)                                   | 0.15              | 0.026 (0.027)                                    | 0.34              |
| 20:4n-6 (AA)                                       | -0.043 (0.042)                                  | 0.31     | 0.050 (0.054)                                    | 0.35     | 0.020 (0.058)                                    | 0.73              | 0.053 (0.064)                                    | 0.41              |
| 22:4n-6 (DTA)                                      | -0.003 (0.004)                                  | 0.45     | 0.002 (0.003)                                    | 0.59     | -0.005 (0.006)                                   | 0.42              | 0.001 (0.006)                                    | 0.86              |
| 22:5n-6 (n6-DPA)                                   | -0.002 (0.005)                                  | 0.65     | 0.012 (0.007)                                    | 0.07     | 0.019 (0.007)                                    | 0.01              | 0.012 (0.010)                                    | 0.21              |
| <b>PUFA ratios</b>                                 |                                                 |          |                                                  |          |                                                  |                   |                                                  |                   |
| GLA/LA ( $\Delta$ 6-desaturase)                    | 0.00002 (0.00004)                               | 0.58     | 0.0001 (0.00004)                                 | 0.03     | 0.0001 (0.0001)                                  | 0.15              | -0.0002 (0.0001)                                 | 0.01              |
| AA/DGLA ( $\Delta$ 5-desaturase)                   | -0.025 (0.026)                                  | 0.35     | -0.008 (0.029)                                   | 0.78     | 0.028 (0.028)                                    | 0.33              | -0.023 (0.039)                                   | 0.55              |
| <b>MVPA high vs. low (reference group)</b>         |                                                 |          |                                                  |          |                                                  |                   |                                                  |                   |
| Sum of n-3 PUFAs (% of total fatty acids)          | -0.28 (0.14)                                    | 0.06     | -0.32 (0.17)                                     | 0.06     | 0.25 (0.18)                                      | 0.17              | -0.08 (0.19)                                     | 0.69              |
| 18:3n-3 (ALA)                                      | -0.003 (0.01)                                   | 0.65     | 0.01 (0.01)                                      | 0.40     | -0.01 (0.01)                                     | 0.53              | 0.01 (0.01)                                      | 0.32              |
| 20:5n-3 (EPA)                                      | -0.03 (0.02)                                    | 0.12     | -0.002 (0.01)                                    | 0.90     | 0.06 (0.02)                                      | 0.02              | 0.02 (0.02)                                      | 0.42              |
| 22:5n-3 (DPA)                                      | -0.03 (0.02)                                    | 0.22     | -0.06 (0.03)                                     | 0.01     | 0.05 (0.03)                                      | 0.04              | 0.02 (0.02)                                      | 0.33              |
| 22:6n-3 (DHA)                                      | -0.21 (0.13)                                    | 0.12     | -0.26 (0.16)                                     | 0.09     | 0.15 (0.16)                                      | 0.36              | -0.13 (0.18)                                     | 0.45              |

|                                                  |                  |      |                 |      |                     |                   |                  |      |
|--------------------------------------------------|------------------|------|-----------------|------|---------------------|-------------------|------------------|------|
| <b>Sum of n-6 PUFAs (% of total fatty acids)</b> | -0.43 (0.31)     | 0.17 | 0.09 (0.27)     | 0.73 | <b>-1.37 (0.33)</b> | <b>&lt;0.001*</b> | -0.46 (0.37)     | 0.21 |
| 18:2n-6 (LA)                                     | -0.34 (0.32)     | 0.29 | -0.10 (0.34)    | 0.76 | <b>-1.53 (0.39)</b> | <b>&lt;0.001*</b> | -0.44 (0.43)     | 0.30 |
| 18:3n-6 (GLA)                                    | -0.002 (0.004)   | 0.52 | 0.01 (0.004)    | 0.05 | 0.01 (0.004)        | 0.05              | -0.01 (0.01)     | 0.12 |
| 20:2n-6 (EDA)                                    | -0.00003 (0.01)  | 1.00 | -0.0004 (0.01)  | 0.97 | -0.03 (0.01)        | 0.02              | -0.01 (0.01)     | 0.29 |
| 20:3n-6 (DGLA)                                   | 0.06 (0.10)      | 0.51 | 0.14 (0.09)     | 0.14 | -0.13 (0.10)        | 0.18              | 0.03 (0.13)      | 0.79 |
| 20:4n-6 (AA)                                     | -0.001 (0.001)   | 0.31 | -0.02 (0.24)    | 0.93 | 0.23 (0.28)         | 0.42              | -0.08 (0.29)     | 0.79 |
| 22:4n-6 (DTA)                                    | -0.03 (0.02)     | 0.14 | 0.0004 (0.02)   | 0.98 | 0.02 (0.03)         | 0.60              | 0.01 (0.03)      | 0.65 |
| 22:5n-6 (n6-DPA)                                 | 0.05 (0.02)      | 0.07 | 0.07 (0.03)     | 0.02 | 0.07 (0.03)         | 0.04              | 0.04 (0.04)      | 0.42 |
| <b>PUFA ratios</b>                               |                  |      |                 |      |                     |                   |                  |      |
| GLA/LA ( $\Delta$ 6-desaturase)                  | -0.0001 (0.0002) | 0.75 | 0.0004 (0.0002) | 0.05 | 0.001 (0.0002)      | 0.004             | -0.0003 (0.0003) | 0.34 |
| AA/DGLA ( $\Delta$ 5-desaturase)                 | -0.18 (0.14)     | 0.20 | -0.17 (0.13)    | 0.20 | 0.21 (0.14)         | 0.13              | -0.04 (0.18)     | 0.80 |

- 
- Multivariable linear regression models adjusted for age (years), race, education, marital status, nulliparous, pre-pregnancy body mass index (BMI; kg/m<sup>2</sup>), Alternative Health Eating Index (AHEI) score, and **time between last time of food intake and specimen acquisition (hours)** $\pm$ .
  - Individual PUFA is measured as % of total fatty acids.
  - Sampling weights were applied to all analyses to represent the full NICHD Fetal Growth Studies–Singletons population.
  - \*P-value is significant after Bonferroni correction.
  - § Physical activity in the previous year.
  - † Physical activity since the last visit.
  - $\pm$  Missing values in AHEI were imputed by mean of each visit.
  - Abbreviations: PUFA, polyunsaturated fatty acids; AA, arachidonic acid; ALA, alpha-linolenic acid; DGLA, dihomo-gamma-linolenic acid; DHA, docosahexaenoic acid; DPA, docosapentaenoic acid; DTA, docosatetraenoic acid; EDA, eicosadienoic acid; EPA, eicosapentaenoic acid; GDM, gestational diabetes mellitus; GLA, gamma-linolenic acid; LA, linoleic acid; PUFA, polyunsaturated fatty acid
-
